# Supplementary material for: Unexpected electro-catalytic activity of the CO reduction reaction on Cr-embedded poly-phthalocyanine realized by strain engineering: a computational study
Source: Royal Society of Chemistry journal article supplement (doi:10.1039/d3cp00861d), 2023-01-01
Supplement: d3cp00861d1.pdf [file d3cp00861d1.pdf]

***Electronic supplementary information (ESI)***

**Unexpected electro-catalytic activity of CO reduction reaction on Cr-embedded  
poly-phthalocyanine realized by strain engineering: A computational study**

Wenzhen Xu,<sup>a,b</sup> Yunpeng Shu,<sup>a</sup> Mengmeng Xu,<sup>a</sup> Juan Xie,<sup>a</sup> Youyong Li<sup>c,\*</sup>

and Huilong Dong<sup>a,d,\*</sup>

<sup>a</sup> School of Materials Engineering, Changshu Institute of Technology, Changshu,  
Jiangsu 215500, China

<sup>b</sup> College of Materials Science and Engineering, Xi'an Shiyou University, Xi'an,  
Shaanxi 710065, China

<sup>c</sup> Institute of Functional Nano & Soft Materials (FUNSOM), Soochow University,  
Suzhou, Jiangsu 215123, China

<sup>d</sup> Key Laboratory of Advanced Energy Materials Chemistry (Ministry of Education),  
Nankai University, Tianjin 300071, China

E-mail: yyli@suda.edu.cn (Y. Li); huilong\_dong@126.com (H. Dong)

**Table S1.** The DFT calculated total energy and strain energy of graphene and MoS<sub>2</sub> at specific strain (strain energy is obtained based on the relative energy without strain).

| Strain                    | Graphene |          | MoS <sub>2</sub> |            |
|---------------------------|----------|----------|------------------|------------|
|                           | 0%       | +20%     | 0%               | +10%       |
| <b>Total Energy (eV)</b>  | -2072.77 | -2069.48 | -259791.62       | -259790.07 |
| <b>Strain Energy (eV)</b> | 0        | 3.29     | 0                | 1.56       |

**Table S2.** The calculated limiting potential ( $U_L$ ) values of CORR electro-catalysis with CH<sub>4</sub> as the product as reported in recent literatures.

| Name                                                         | $U_L$ (V) | References                           |
|--------------------------------------------------------------|-----------|--------------------------------------|
| MoS <sub>2</sub> with sulfur divacancies                     | -0.53     | ChemSusChem, 2018 <sup>1</sup>       |
| Fe <sub>19</sub> @Cu <sub>60</sub> CSNP                      | -0.58     | Nanoscale, 2019 <sup>2</sup>         |
| W-anchored Mo <sub>2</sub> TiC <sub>2</sub> O <sub>2-x</sub> | -0.20     | Nanoscale, 2020 <sup>3</sup>         |
| B-doped BP under -7% strain                                  | -0.38     | J. Mater. Chem. A, 2020 <sup>4</sup> |
| CrPPc under -5% biaxial strain                               | -0.09     | This work                            |

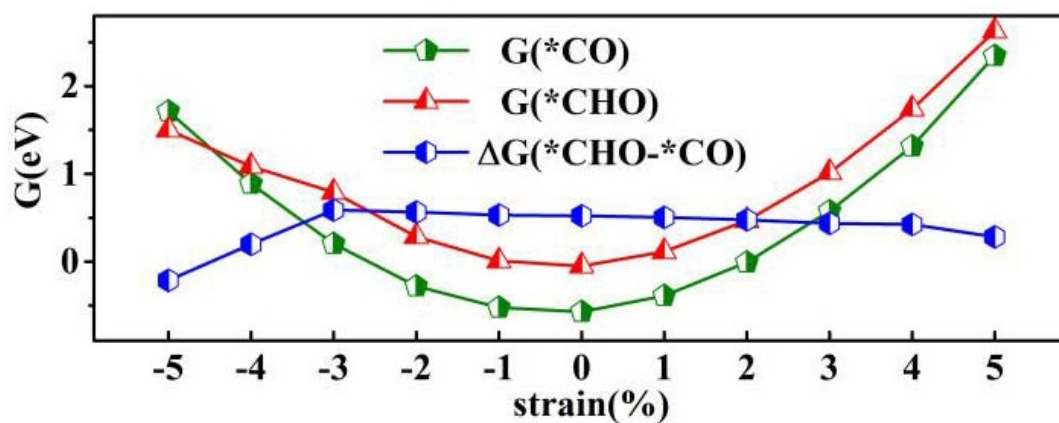

**Figure S1.** The free energy changes ( $\Delta G$ ) of  $^*CO$ ,  $^*CHO$  and  $^*CHO-^*CO$  on CrPPc with biaxial strain of  $-5\% \sim +5\%$ .

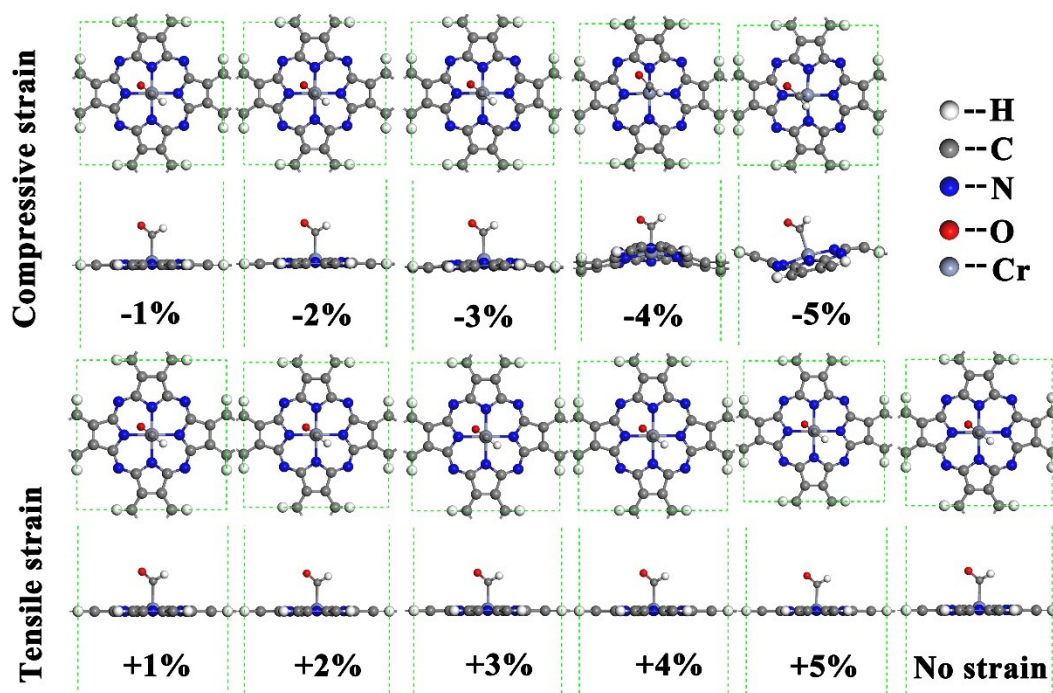

**Figure S2.** The optimized adsorption configurations of  $^*CHO$  on CrPPc with biaxial strain of  $-5\% \sim +5\%$ .

## References

1. Z. W. Chen, W. Gao, W. T. Zheng and Q. Jiang, *ChemSusChem*, 2018, **11**, 1455-1459.
2. H. Dong, C. Liu, Y. Li and D.-e. Jiang, *Nanoscale*, 2019, **11**, 11351-11359.
3. L. Li, B. Li, H. Guo, Y. Li, C. Sun, Z. Tian and L. Chen, *Nanoscale*, 2020, **12**, 15880-15887.
4. Z. Chen, X. Liu, J. Zhao, Y. Jiao and L. Yin, *J. Mater. Chem. A*, 2020, **8**, 11986-11995.
